# Supplementary material for: Protective effects of a unique combination of nutritionally active ingredients on risk factors and gene expression associated with atherosclerosis in C57BL/6J mice fed a high fat diet
Source: Food Funct. 2021 Mar 9;12(8):3657–71. doi: 10.1039/d0fo02867c (PMC8359826; doi:10.1039/d0fo02867c)
Supplement: FO-012-D0FO02867C-s001 [file FO-012-D0FO02867C-s001.pdf]

## **Supplementary Data:**

### **Protective effects of a unique combination of nutritionally active ingredients on risk factors and gene expression associated with atherosclerosis in C57BL/6J mice fed a high fat diet**

Joe W.E. Moss<sup>1</sup>, Jessica O. Williams<sup>1</sup>, Wijdan Al-Ahmadi<sup>1</sup>, Victoria O'Morain<sup>1</sup>, Yee-Hung Chan<sup>1</sup>, Timothy R. Hughes<sup>2</sup>, Juan B. Menendez-Gonzalez<sup>3</sup>, Alhomidi Almotiri<sup>3</sup>, Sue F. Plummer<sup>4</sup>, Neil P. Rodrigues<sup>3</sup>, Daryn R. Michael<sup>4</sup> and Dipak P. Ramji<sup>1\*</sup>.

<sup>1</sup>Cardiff School of Biosciences, Cardiff University, Sir Martin Evans Building, Museum Avenue, Cardiff CF10 3AX, UK.

<sup>2</sup>Systems Immunity Research Institute, School of Medicine, Cardiff University, Cardiff CF14 4XN, UK.

<sup>3</sup>European Cancer Stem Cell Research Institute, Cardiff School of Biosciences, Cardiff University, Hadyn Ellis Building, Maindy Road, Cardiff CF24 4HQ, UK.

<sup>4</sup>Cultech Limited, Unit 2 Christchurch Road, Baglan Industrial Park, Port Talbot, SA12 7BZ, UK.

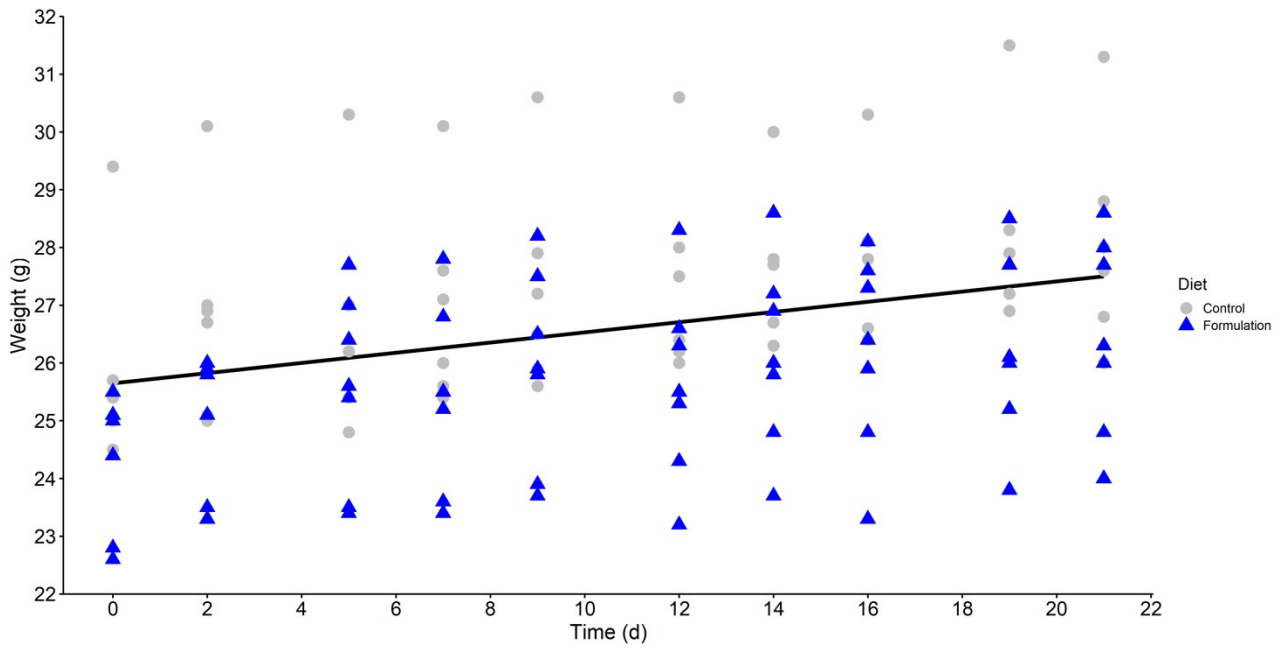

**Figure S1. The rate of weight gain in C57BL/6J mice fed a HFD was not altered by the formulation**

The weight of the mice was measured approximately every 2 days for the entire duration of the study (21 days). Mice were fed a HFD which was either supplemented with the vehicle control (circle) or a 1x human equivalent physiological dose of the formulation (triangle). The prediction of the average rate of weight gain, as calculated by a generalized linear mixed model with a Gamma error distribution and identity link function, is displayed from 13 mice (control n=6; formulation n=7). The raw data from each mouse are also presented to provide a visual representation of the spread within the data. The initial statistical model showed that there was no significant effect for the formulation treatment or the interaction between time and treatment type. Therefore, they were removed from the final statistical model during model refinement.

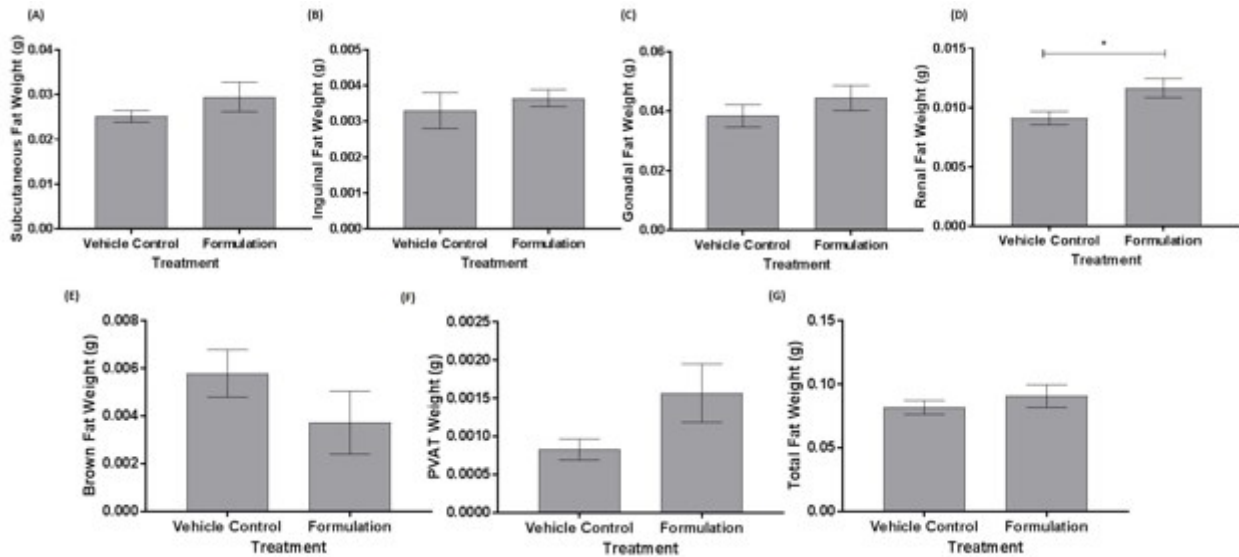

**Figure S2. The formulation increases the weight of renal fat pad in C57BL/6J mice fed a HFD**

The subcutaneous (A), inguinal (B), gonadal (C), renal (D), interscapular brown (E), thoracic perivascular adipose tissue (PVAT) (F) and total (G) fats from C57BL/6J mice were weighed after 21 days of a HFD and treatment with either a vehicle control or a 1x human equivalent physiological dose of the formulation, and normalized to the total body weight of individual mice. The data are mean  $\pm$  SEM from 13 mice (control n=6; formulation n=7). Statistical analysis was performed using an unpaired Student's t-test (equal variance) on either untransformed data (C, D, E and F) or log-transformed data (A, B and G) where \*  $p \leq 0.05$ .

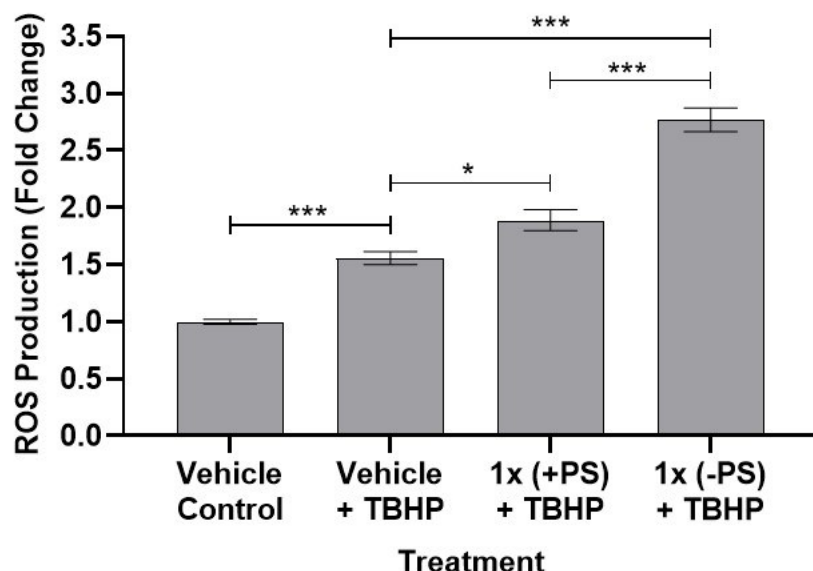

**Figure S3. The formulation induces ROS production in human macrophages**

ROS production was assessed in phorbol-12-myristate-13-acetate differentiated THP-1 macrophages that were either treated with vehicle (vehicle control) or tert-Butyl hydroperoxide (TBHP; 50  $\mu$ M) or TBHP (50  $\mu$ M) in the presence of the formulation containing phytosterols (+PS) or TBHP (50  $\mu$ M) in the presence of the formulation lacking phytosterols (-PS) for 3 h. ROS production was measured in a fluorescence microplate reader, with excitation at 485 nm and emission detected at 535 nm. The value obtained with the vehicle control was arbitrary assigned as 1. The data are mean  $\pm$  SEM from three independent experiments. Statistical analysis was performed using a One-way ANOVA with Tukey's post-hoc analysis where \*  $p \leq 0.05$  and \*\*\*  $p \leq 0.001$ .

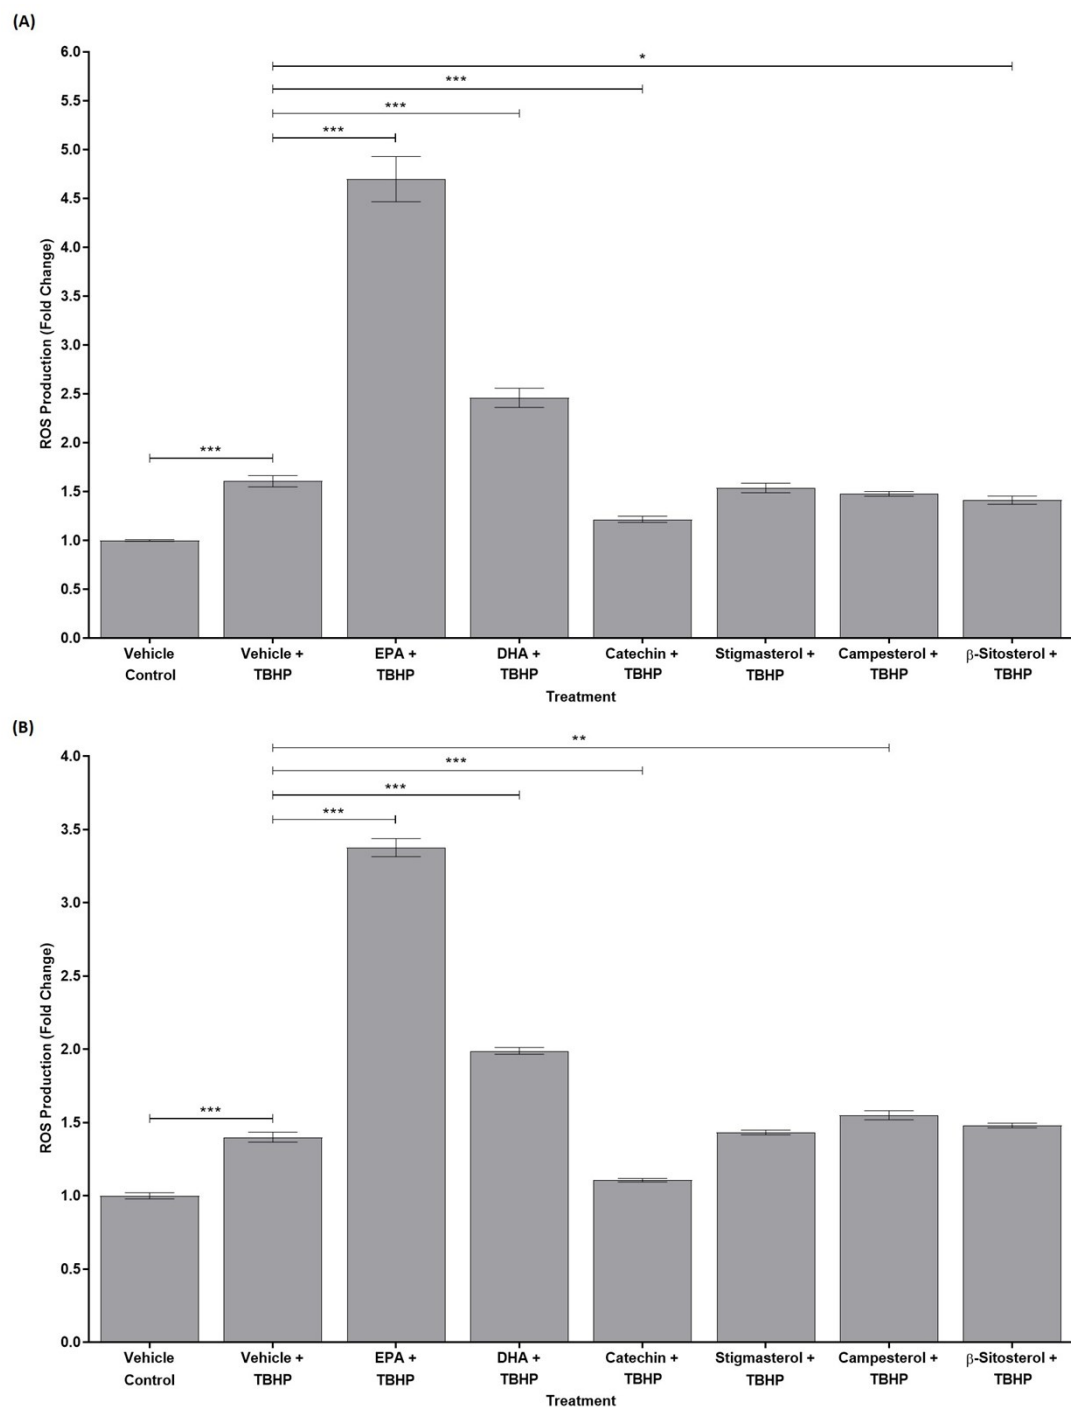

**Fig. S4. Key ingredients in the formulation can modify ROS production in human monocytes and macrophages.**

ROS production was assessed in THP-1 monocytes (A) and THP-1 macrophages (B) that were either treated with vehicle (vehicle control) or TBHP; 50  $\mu$ M or TBHP (50  $\mu$ M) in the presence 30  $\mu$ g/ml EPA, 19.7  $\mu$ g/ml DHA, 1.5  $\mu$ g/ml catechin, 10  $\mu$ g/ml stigmasterol, 13.9  $\mu$ g/ml campesterol or 27.2  $\mu$ g/ml  $\beta$ -sitosterol. ROS production was measured in a fluorescence microplate reader, with excitation at 485 nm and emission detected at 535 nm. The value obtained with the vehicle control was arbitrary assigned as 1. The data are mean  $\pm$  SEM from three independent experiments. Statistical analysis was performed on the log-transformed data using a One-way ANOVA with Dunnett post-hoc analysis where \*  $p \leq 0.05$ , \*\*  $p \leq 0.01$  and \*\*\*  $p \leq 0.001$ .

**Table S1: Details of reagents used for flow cytometry**

| <b>Reagent</b>            | <b>Fluorochrome where applicable</b> | <b>Supplier</b> | <b>Clone</b> | <b>Catalogue number</b> |
|---------------------------|--------------------------------------|-----------------|--------------|-------------------------|
| CD117 (c-Kit)             | APC                                  | BioLegend       | 2B8          | 105811                  |
| Ly-6A/E (Sca-1)           | PE                                   | BioLegend       | D7           | 108107                  |
| CD48                      | FITC                                 | BioLegend       | HM48-1       | 103403                  |
| CD150                     | PE/Cy7                               | BioLegend       | TC15-12F12.2 | 115913                  |
| Ly-6A/E (Sca-1)           | APC/Cy7                              | BioLegend       | D7           | 108125                  |
| CD34                      | FITC                                 | BD Biosciences  | RAM34        | 560238                  |
| CD16/32                   | PE/Cy7                               | BioLegend       | 93           | 101317                  |
| CD127 (IL-7R $\alpha$ )   | PE                                   | BioLegend       | SB/199       | 121111                  |
| Ly-6G/Ly-6C (Gr-1)        | PE/Cy7                               | BioLegend       | RB6-8C5      | 108415                  |
| CD11b (Mac-1)             | PE                                   | BioLegend       | M1/70        | 101207                  |
| CD45R/B220                | APC                                  | BioLegend       | RA3-6B2      | 103212                  |
| CD3                       | FITC                                 | BioLegend       | 17A2         | 100203                  |
| TER-119                   | APC/Cy7                              | BioLegend       | TER-119      | 116223                  |
| Biotin CD3                |                                      | BioLegend       | 17A2         | 100244                  |
| Biotin CD4                |                                      | BioLegend       | GK1.5        | 100404                  |
| Biotin CD8a               |                                      | BioLegend       | 53-6.7       | 100703                  |
| Biotin Ly-6G/Ly-6C (Gr-1) |                                      | BioLegend       | RB6-8C5      | 108404                  |
| Biotin CD11b              |                                      | BioLegend       | M1/70        | 101204                  |
| Biotin CD45R/B220         |                                      | BioLegend       | RA3-6B2      | 103204                  |
| Biotin TER-119            |                                      | BioLegend       | TER-119      | 116204                  |
| TruStain fcX™ (CD16/32)   |                                      | BioLegend       | 93           | 101319                  |
